# Supplementary material
Source: publisher site journal article supplement (https://www.degruyter.com/publication/dbid/pmbz/downloadAsset/PMBZ_PmbZ_Erlaeuterungen.pdf)
Supplement: Supplementary file 1 [file PMBZ_PmbZ_Erlaeuterungen.pdf]

# Erläuterungen zur Datenbank der “Prosopographie der mittelbyzantinischen Zeit”

## Artikelkopf

### Originalname (Artikeltitel)

Gibt die “originale” Namensform unter Einschluß von diakritischen und Umschriftzeichen an. Bei mehreren Namensformen sind die Varianten im entsprechenden Abschnitt des Artikels (N:) und zum Teil auch im Index der Namensvarianten zu finden.

### Quellename (Artikeluntertitel)

Gibt, sofern vorhanden, die griechische Schreibweise des Namens in der jeweiligen Hauptquelle an. Bei mehreren Namensformen sind die Varianten im entsprechenden Abschnitt des Artikels (N:) und zum Teil auch im Index der Namensvarianten zu finden.

## Angaben zur behandelten Person

### Personenkennziffer

Enthält die Personenkennziffer der in dem jeweiligen Artikel behandelten Person. Ein Zusatz weist auf etwaige Ergänzungen (add.) bzw. Korrekturen (corr.) und auf “neue” Personenartikel (plus) hin, die in der gedruckten Fassung von Abt. I der PmbZ nicht oder nur in den Addenda und Corrigenda (Bd. 6) enthalten sind.

### Namensvarianten

Gibt die Varianten des Originalnamens sowie Bei- und/oder Familiennamen an.

### Klerus

Gibt an, ob es sich um Kleriker oder um Laien handelt. Kriterien sind: Klerus, Laie, Klerus und Laie (wenn z. B. jemand erst nach längerer Karriere als Laie Kleriker geworden ist) sowie unklar.

### Geschlecht

Gibt das Geschlecht der behandelten Person an. Kriterien sind: Frau, Mann, Eunuch, Beides (bei Gruppen oder Familien) sowie unklar (etwa bei Kindern).

## **Zeit**

Gibt das Jahrhundert an, in dem die jeweilige Person lebte. Wenn diese Lebenszeit sich über eine Jahrhundertgrenze erstreckte oder bei ungenauer Datierung können auch mehrere Jahrhunderte angegeben sein.

## **Erste Erwähnung**

Sofern mit einer Person ein konkretes Jahresdatum verbunden werden kann, wird es in diesem Feld angeführt. Bei mehreren Daten ist jeweils das erste genannt.

## **Ethnos**

Gibt, soweit erkennbar, die Nationalität an. Dieser Index ist auf die Artikel der Abt. II der PmbZ beschränkt.

## **Religion**

Gibt, soweit erkennbar, die religiöse Zugehörigkeit an. Dieser Index ist auf die Artikel der Abt. II der PmbZ beschränkt.

## **Titel / Beruf**

Gibt Titel und/oder Beruf der behandelten Person an.

## **Personenartikel**

Innerhalb eines Personenartikels in der PmbZ können Sie auf die folgenden Siglen stoßen:

**N:** Namensvarianten

**T:** Titel/Beruf

**V:** Vita

**W:** Werke

**Q:** Quellen

**(Hist.):** Historiographie

**(Ep.):** Epistolographie

**(Conc.):** Konzilsakten

**(Hag.):** Hagiographie

**(Hom.):** Homiletik

**(Fs.):** Fachschriften

**(Sonst.):** Sonstige Quellen

**(Sg.):** Siegel

**(Inscr.):** Inschriften

- (**Num.**): Numismatik
- (**lat.**): lateinische Quellen
- (**arm.**): armenische Quellen
- (**georg.**): georgische Quellen
- (**syr.**): syrische Quellen
- (**arab.**): arabische Quellen
- (**kopt.**): koptische Quellen
- (**hebr.**): hebräische Quellen
- (**sl.**): slawische Quellen

**L:** Sekundärliteratur

**P:** Probleme

## Weitere Indices am Artikelende

### Geographische Namen

Gibt die in dem jeweiligen Artikel erwähnten geographischen Bezeichnungen an. Nicht aufgenommen worden sind übergreifende Bezeichnungen wie z. B. Athos, Konstantinopel oder Italien. Jedoch sind in solchen Fällen die jeweiligen Unterkategorien aufgeführt, unter denen die behandelte Person gefunden werden kann.

### Quellen

Gibt die für den jeweiligen Artikel benutzten Quellen an.

## Weitere Informationen

Die Publikation *Prosopographie der mittelbyzantinischen Zeit Online* wird auf der Plattform De Gruyter Online vom Verlag De Gruyter angeboten. Mit dem folgenden Link gelangen Sie in die Hilfefunktion von De Gruyter Online, über die Sie allgemeine Informationen zur Suche in Datenbanken erhalten: <http://www.degruyter.com/dg/databasehelp>
